# Supplementary material for: A novel CD4+ CTL subtype characterized by chemotaxis and inflammation is involved in the pathogenesis of Graves’ orbitopathy
Source: PubMed Central journal article supplement (PMC8027210; doi:10.1038/s41423-020-00615-2), 2021-01-29
Supplement: 41423_2020_615_MOESM2_ESM.pdf [file 41423_2020_615_MOESM2_ESM.pdf]

**Supplementary Table 1 | Inclusion criteria and exclusion criteria for GO and GH patients in sc-RNA seq**

|    |                    |                                                                                                                                                                                                                                                                                                                                                                                                                                                                                                                                                                                                                                                                                                                                                                       |
|----|--------------------|-----------------------------------------------------------------------------------------------------------------------------------------------------------------------------------------------------------------------------------------------------------------------------------------------------------------------------------------------------------------------------------------------------------------------------------------------------------------------------------------------------------------------------------------------------------------------------------------------------------------------------------------------------------------------------------------------------------------------------------------------------------------------|
| GO | Inclusion criteria | <ol style="list-style-type: none"> <li>1. Moderately to severely active GO;</li> <li>2. Clinical Activity Score (CAS) <math>\geq</math> 3, CAS is based on the classical signs of acute inflammation (pain, redness, swelling, and impaired function) was proposed as a clinical classification to discriminate easily between the active and quiescent stages of the disease;</li> <li>3. The grade of NOSPECS <math>\geq</math> 4. NOSPECS classification grades exclusively for clinical severity and does not provide a means of distinguishing inflammatory progressive. Class 4 refers to extraocular muscle involvement (usually with diplopia);</li> <li>4. The duration of GO is less than 3 months;</li> <li>5. The age in the range of [18, 65]</li> </ol> |
|    | exclusion criteria | <ol style="list-style-type: none"> <li>1. Patients who were infected by fungus, mycobacterium tuberculosis, hepatitis virus and/or any other uncontrolled bacterium, virus and fungus;</li> <li>2. Patients who are allergic to methylprednisolone;</li> <li>3. Pregnant and lactating women;</li> <li>4. Combined with other autoimmune diseases.</li> <li>5. Patients who are suffering from active peptic ulcer, recent gastrointestinal surgery, serious diabetes, hypertension, hyperlipidemia, glaucoma, osteoporosis, heart disease, cardiac failure, hepatic impairment, impaired renal function and urolithiasis</li> </ol>                                                                                                                                  |
| GH | Inclusion criteria | <ol style="list-style-type: none"> <li>1. Newly diagnosed (duration &lt; 2 months);</li> <li>2. The age in the range of [18, 65]</li> </ol>                                                                                                                                                                                                                                                                                                                                                                                                                                                                                                                                                                                                                           |
|    | exclusion criteria | <ol style="list-style-type: none"> <li>1. Patients who were infected by fungus, mycobacterium tuberculosis, hepatitis virus and/or any other uncontrolled bacterium, virus and fungus;</li> <li>2. Patients who are allergic to anti-thyroid drugs;</li> <li>3. Pregnant and lactating women;</li> <li>4. Combined with other autoimmune diseases;</li> <li>5. Patients who are suffering from one or two manifestations, including pretibial myxedema, heart disease and hepatic impairment</li> </ol>                                                                                                                                                                                                                                                               |

**Supplementary Table 2 | the category of data applied for analysis in this study**

| Analysis                                                      | Target cells                                                   | Samples                                                                                                                        |
|---------------------------------------------------------------|----------------------------------------------------------------|--------------------------------------------------------------------------------------------------------------------------------|
| sc-RNA seq                                                    | CD4+ T                                                         | 3 treatment naïve GH,<br>6 treatment naïve GO,<br>4 treatment withdrawal GO (the<br>same patients with treatment naïve<br>GO ) |
| Flow cytometry                                                | CD4+ T cell<br>types identified<br>by sc-RNA seq               | 26 GO, 9 GH, 10 HC                                                                                                             |
|                                                               | Cytotoxic<br>related<br>molecules in<br>GO and GH              |                                                                                                                                |
|                                                               | CD4+KLRG1+<br>T cells and<br>related<br>cytotoxic<br>molecules |                                                                                                                                |
| Multicolor<br>immunofluorescence                              | CD4, CD8,<br>GZMB                                              | 5 GO (orbital tissue),<br>5 inflammatory pseudotumor<br>(orbital tissue).                                                      |
| TCR-sequencing<br>analysis                                    | CD4+KLRG1+<br>T cells,<br>CD4+ naïve<br>T cells                | 7 GO                                                                                                                           |
| Degranulation<br>assay and Multiple<br>lymphocyte<br>reaction | CD4+ T cells                                                   | 8 GO                                                                                                                           |

**Supplementary Table 3 | Patient information and sequencing data for sc-RNA seq**

| Patient ID | Diagnosis | Gender | Age | FT4 (pmol/L) | CAS | Treatment | Target cell | Cell number | Mean reads per cell | Median number of genes per cell | Sequencing saturation |
|------------|-----------|--------|-----|--------------|-----|-----------|-------------|-------------|---------------------|---------------------------------|-----------------------|
| A02        | GH        | M      | 45  | 6.02         | 0   | MMI       | CD4+ T      | 7,342       | 74,451              | 1,502                           | 84.9%                 |
| B02        | GH        | F      | 21  | 30           | 0   | MMI       | CD4+ T      | 11,221      | 51,419              | 1,278                           | 82.4%                 |
| B03        | GH        | F      | 26  | 40.4         | 0   | MMI       | CD4+ T      | 6,490       | 68,193              | 1,329                           | 84.3%                 |
| A06        | GO        | F      | 44  | 15.4         | 3   | RAPA      | CD4+ T      | 5,658       | 129,053             | 1,484                           | 90.7%                 |
| B06        | GO        | M      | 56  | 14.3         | 6   | IVMP+RAPA | CD4+ T      | 7,406       | 72,075              | 1,328                           | 85.2%                 |
| B01        | GO (B, A) | F      | 44  | 16.8         | 3   | IVMP      | CD4+ T      | 7,642       | 82,438              | 1,410                           | 86.1%                 |

|     |           |   |    |      |   |      |        |        |         |       |       |
|-----|-----------|---|----|------|---|------|--------|--------|---------|-------|-------|
| B05 |           |   |    | 15.8 | 0 | IVMP | CD4+ T | 5,228  | 119,352 | 1,209 | 92.6% |
| A03 | GO (B, A) | M | 47 | 13.5 | 3 | IVMP | CD4+ T | 5,051  | 117,379 | 1,378 | 89.5% |
| A05 |           |   |    | 15.1 | 0 | IVMP | CD4+ T | 6,778  | 87,149  | 1,139 | 90.1% |
| A04 | GO (B, A) | M | 45 | 16.4 | 6 | IVMP | CD4+ T | 7,691  | 78,357  | 1,468 | 81.3% |
| B04 |           |   |    | 11.8 | 5 | IVMP | CD4+ T | 3,949  | 153,506 | 1,350 | 92.7% |
| A07 | GO (B, A) | M | 48 | 11.1 | 4 | IVMP | CD4+ T | 6,577  | 83,210  | 1,303 | 85.4% |
| B07 |           |   |    | 20.5 | 1 | IVMP | CD4+ T | 12,604 | 42,146  | 1,139 | 72.7% |

B is before IVMP treatment. A is after IVMP treatment. M is male. F is female. FT4 is free thyroxine. CAS, Clinical Activity Score is based on the classical signs of acute inflammation (pain, redness, swelling, and impaired function) was proposed as a clinical classification to discriminate easily between the active and quiescent stages of the disease. MMI, methimazole; IVMP, pulses of intravenous methylprednisolone.

### Supplementary Table 4 | Cell numbers and proportions of six cell types identified by sc-RNA seq

| Cell type          | Cell numbers | Proportion in CD4+ T cells |
|--------------------|--------------|----------------------------|
| CT1- SELL+ CCR7+   | 22,322       | 37.33%                     |
| CT2- FOXP3+ IKZF2+ | 4,226        | 7.07%                      |
| CT3- CXCR5+ LIMS1+ | 10,347       | 17.30%                     |
| CT4- CCR6+ RORC+   | 8,212        | 13.73%                     |
| CT5- KLRG1+ GZMB-  | 5,969        | 9.98%                      |
| CT6- KLRG1+ GZMB+  | 6,041        | 10.10%                     |
| Unknown            | 2,678        | 4.48%                      |
| Total              | 59,795       | 100.00%                    |

### Supplementary Table 5 | Cell markers and percentages of flow cytometry for CD4+ T cells types identified by sc-RNA seq

| Cell type             | Cell markers (FACS)   | Proportion in CD4+ T cells |
|-----------------------|-----------------------|----------------------------|
| CT1- SELL+ CCR7+      | CD4+CD25-CD45RA-CCR7+ | 23.01% ± 5.34%             |
| CT2- FOXP3+<br>IKZF2+ | CD4+CD25+FOXP3+       | 1.98% ± 0.27%              |
| CT3- CXCR5+<br>LIMS1+ | CD4+CXCR5+ICOS+       | 6.18% ± 1.61%              |
| CT4- CCR6+<br>RORC+   | CD4+CCR6+CCR4+CXCR3-  | 2.85% ± 0.82%              |
| CT5- KLRG1+<br>GZMB-  | CD4+KLRG1+GZMB-       | 18.52% ± 9.85%             |
| CT6- KLRG1+<br>GZMB+  | CD4+KLRG1+GZMB+       | 7.39% ± 3.50%              |
